# Supplementary material
Source: PubMed Central journal article supplement (PMC4688957)

## AT9.2 osteoblasts

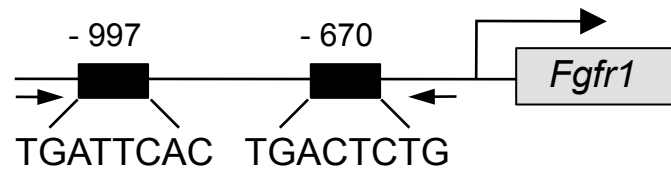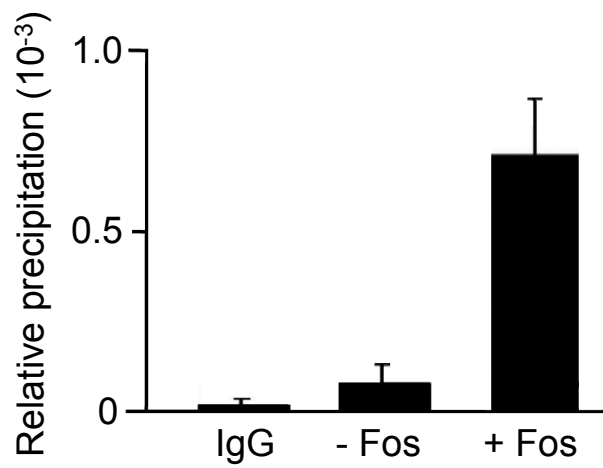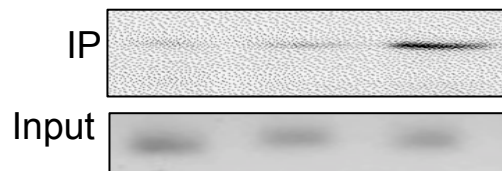

Supplementary Figure S1  
Weekes et al

Supplement: NIHMS64434-supplement-1.pdf [file NIHMS64434-supplement-1.pdf]

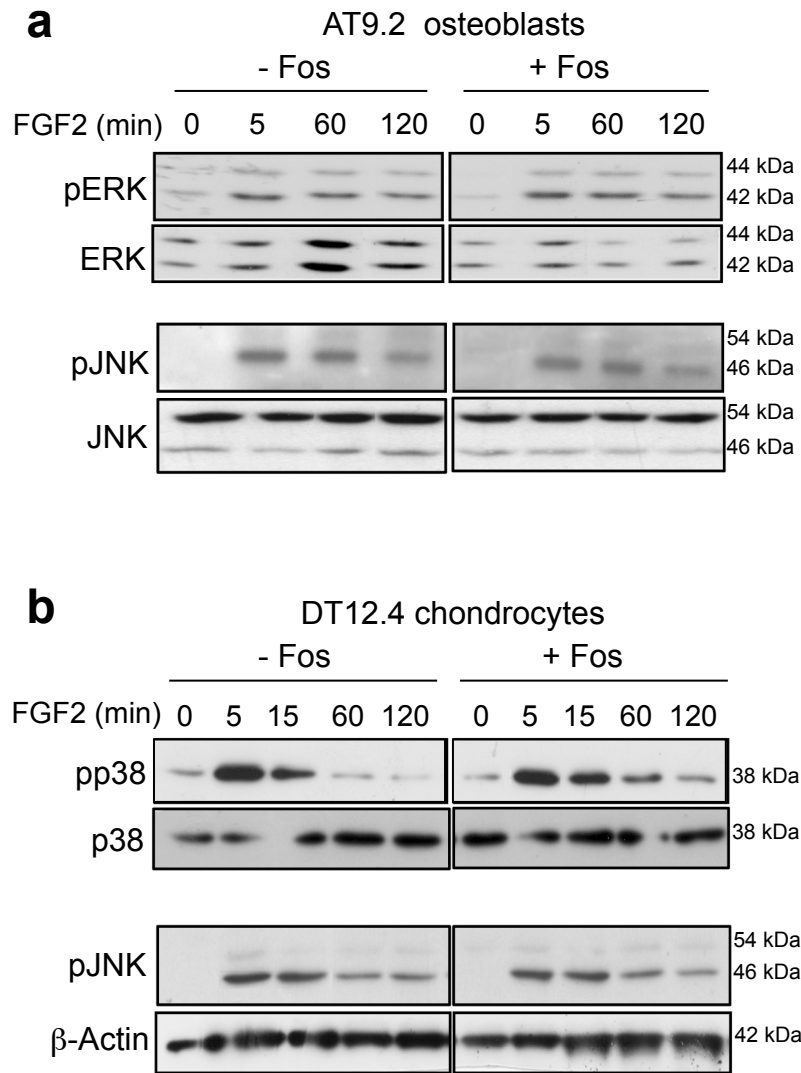

Supplementary Figure S2  
Weekes et al

Supplement: NIHMS64434-supplement-2.pdf [file NIHMS64434-supplement-2.pdf]

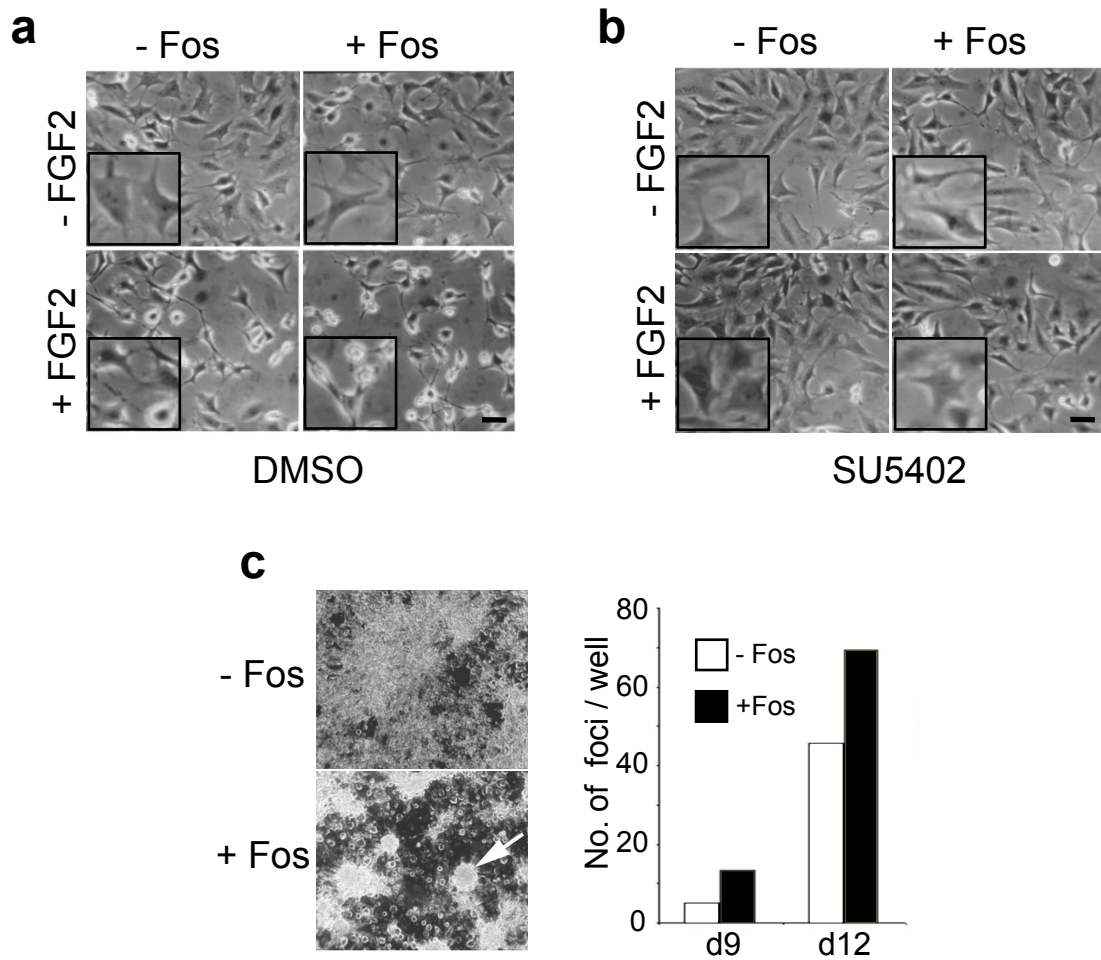

Supplementary Figure S3  
Weekes et al

Supplement: NIHMS64434-supplement-3.pdf [file NIHMS64434-supplement-3.pdf]

## Osteosarcoma

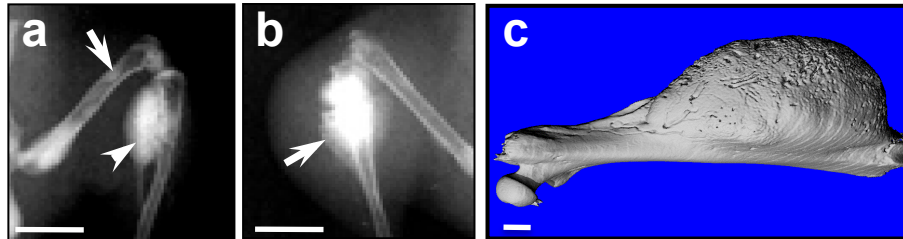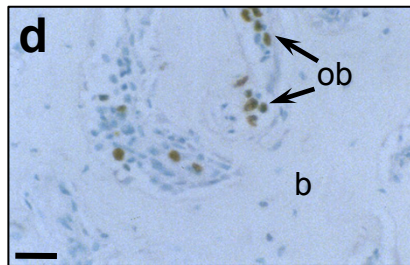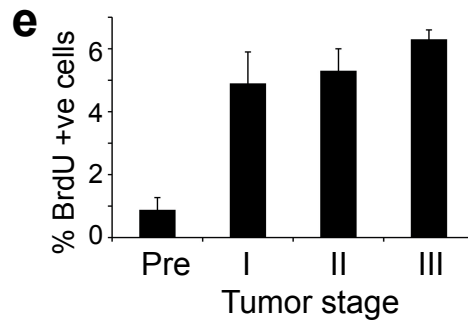

## Chondrosarcoma

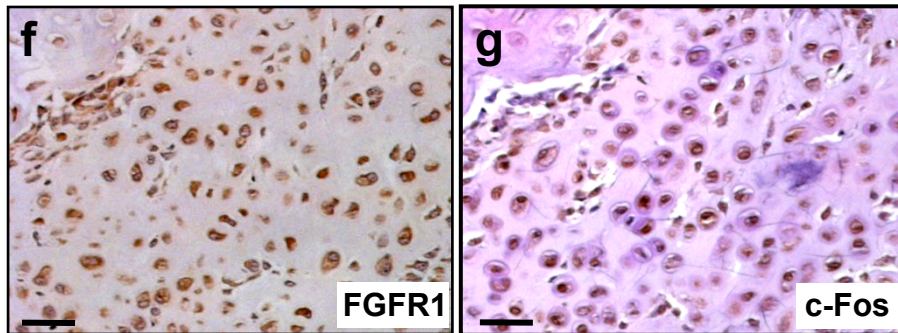

Supplementary Figure S4  
Weekes et al

Supplement: NIHMS64434-supplement-4.pdf [file NIHMS64434-supplement-4.pdf]
